# Supplementary material for: Direct chlorination of alcohols with chlorodimethylsilane catalyzed by a gallium trichloride/tartrate system under neutral conditions
Source: Royal Society of Chemistry journal article supplement (doi:10.1039/b804589e), 2008-01-01
Supplement: b804589e.pdf [file b804589e.pdf]

## Direct Chlorination of Alcohols with Chlorodimethylsilane Catalyzed by a Gallium Trichloride/Tartrate System under Neutral Conditions

Makoto Yasuda, Kenji Shimizu, Satoshi Yamasaki, and Akio Baba

*Department of Applied Chemistry and Center for Atomic and Molecular Technologies, Graduate School of Engineering, Osaka University, 2-1 Yamadaoka, Suita, Osaka 565-0871, Japan*

### Supporting Information

**General.** IR spectra were recorded as thin films or as solids in KBr pellets on a HORIBA FT-720 spectrophotometer.  $^1\text{H}$ ,  $^{13}\text{C}$ , and  $^{29}\text{Si}$  NMR spectra were obtained with a 400, 100, and 78.7 MHz spectrometer, respectively, with TMS as internal standard. Mass spectra were recorded on a JEOL JMS-DS303. All reactions were carried out under nitrogen. GLC analyses were performed on a Shimadzu GC-14A with FID using a 15 m  $\times$  3 mm capillary column packed with TC-WAX, TC-5, or TC-1701 (0.25  $\mu\text{m}$ ). Column chromatography was performed on silica gel (MERK C60). Bulb-to-bulb distillation (Kugelrohr) was accomplished in a Sibata GTO-250RS at the oven temperature and pressure indicated. Yields were determined by GLC or  $^1\text{H}$  NMR using internal standards.

**Materials.** Dichloromethane, dehydrated (stabilized with 2-methyl-2-butene) was used without purification. All reagents in Table 1 ( $\text{HSiMe}_2\text{Cl}$  **2**, **4a-e**,  $\text{GaCl}_3$ ,  $\text{GaBr}_3$ ,  $\text{GaI}_3$ ,  $\text{Ga}(\text{OTf})_3$ ,  $\text{InCl}_3$ ,  $\text{AlCl}_3$ ,  $\text{ZnCl}_2$ ,  $\text{TiCl}_4$ , and  $\text{BiCl}_3$ ) and alcohols **1a-f**, **1j**, **1m**, **1n** were commercially available. The alcohols **1k**<sup>1</sup> and **1l**<sup>2</sup> were prepared by known method. The alcohols **1g-i** and silylether **9** were prepared as shown below.

#### 12-Hydroxytetradecyl acetate (**1g**)

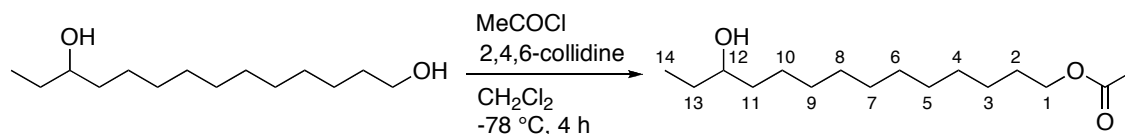

To a solution of tetradecane-1,12-diol (10 mmol) in  $\text{CH}_2\text{Cl}_2$  (20 mL) were added 2,4,6-collidine (20 mmol) and acetyl chloride (13 mmol) at  $-78\text{ }^\circ\text{C}$ .<sup>3</sup> The reaction mixture was stirred for 4 h at  $-78\text{ }^\circ\text{C}$ . The mixture was quenched by HCl aq (1M, 10 mL) and extracted with  $\text{CH}_2\text{Cl}_2$  (20 x 3 mL). The collected organic layers were washed with  $\text{NaHCO}_3$  aq (20 x 2 mL) and dried over  $\text{MgSO}_4$ . The solvent was evaporated and the residue was purified by column chromatography (hexane/EtOAc, 80:20). Further purification was employed by recrystallization to give 12-hydroxytetradecyl acetate as a white solid (5.76 mmol, 58 %). mp:  $35\text{ }^\circ\text{C}$ ; IR: (KBr) 3352 (OH), 1732 (C=O)  $\text{cm}^{-1}$ ;  $^1\text{H}$  NMR: (400 MHz,  $\text{CDCl}_3$ ) 4.05 (t,  $J = 6.8$  Hz, 2H, 1- $\text{H}_2$ ), 3.52 (brs, 1H, 12-H), 2.05 (s, 3H,  $\text{CH}_3\text{CO}$ ), 1.63-1.27 (m, 23H, 2- $\text{H}_2$ , 3- $\text{H}_2$ , 4- $\text{H}_2$ , 5- $\text{H}_2$ , 6- $\text{H}_2$ , 7- $\text{H}_2$ , 8- $\text{H}_2$ , 9- $\text{H}_2$ , 10- $\text{H}_2$ , 11- $\text{H}_2$ , 13- $\text{H}_2$  and OH), 0.94 (t,  $J = 7.6$  Hz, 3H, 14- $\text{H}_3$ );  $^{13}\text{C}$  NMR: (100 MHz,  $\text{CDCl}_3$ ) 171.3 (C, CO), 73.3 (CH, C-12), 64.6 ( $\text{CH}_2$ , C-1), 36.9 ( $\text{CH}_2$ ), 30.1 ( $\text{CH}_2$ ), 29.7 ( $\text{CH}_2$ ), 29.6 ( $\text{CH}_2$ ), 29.5 ( $\text{CH}_2$ ), 29.5 ( $\text{CH}_2$ ), 29.5 ( $\text{CH}_2$ ), 29.2 ( $\text{CH}_2$ ), 36.9 ( $\text{CH}_2$ ), 28.6 ( $\text{CH}_2$ ), 25.9 ( $\text{CH}_2$ ), 25.6 ( $\text{CH}_2$ ), 21.0 ( $\text{CH}_3$ ,  $\text{CH}_3\text{CO}$ ), 9.9 ( $\text{CH}_3$ , C-14); MS: (CI, 200 eV)  $m/z$  273 ( $\text{M}^+ + 1$ , 19), 255 ( $\text{M}^+ + 1 - \text{H}_2\text{O}$ , 100), 195 ( $\text{M}^+ + 1 - \text{H}_2\text{O} - \text{CH}_3\text{COOH}$ , 48); HRMS: (CI, 200 eV) calcd for  $\text{C}_{16}\text{H}_{33}\text{O}_3$  273.2429 found  $m/z$  273.2425 ( $\text{M}^+ + 1$ ). Anal. Calcd for  $\text{C}_{16}\text{H}_{32}\text{O}_3$ : C, 70.54; H, 11.84. Found: C, 70.48; H, 11.61.

### Tetradecane-1,12-diol

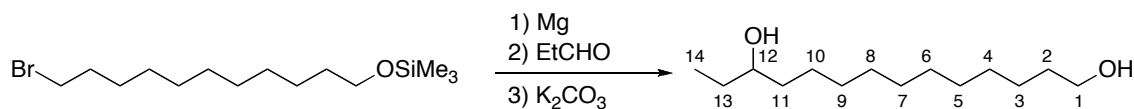

To a solution of Grignard reagent in THF (20 mL), which was synthesized from Mg (30 mmol) and 11-bromo-1-trimethylsilyloxyundecane (20 mmol) was added propionaldehyde (20 mmol) in THF (5 mL) dropwise at  $0\text{ }^\circ\text{C}$ . The reaction mixture was stirred for 20 h at rt. The mixture was cooled to  $0\text{ }^\circ\text{C}$ , then quenched by HCl (1N, 50 mL) and extracted with ether (50 x 3 mL). The collected organic layers were dried over  $\text{MgSO}_4$ . The solvent was evaporated and added MeOH (60 mL). To a solution was added  $\text{K}_2\text{CO}_3$  in some portions at  $0\text{ }^\circ\text{C}$ . The reaction mixture was stirred for 2.5 h at rt. The mixture was cooled to  $0\text{ }^\circ\text{C}$ , then quenched by  $\text{H}_2\text{O}$  (50 mL) and

extracted with ether (50 x 3 mL). The collected organic layers were dried over MgSO<sub>4</sub>. The solvent was evaporated and purified by the residue was purified by column chromatography (hexane/EtOAc, 50:50). Further purification was employed by recrystallization to give tetradecane-1,12-diol as a white solid (6.21 mmol, 31 %). mp: 51-53 °C; IR: (KBr) 3340 (OH) cm<sup>-1</sup>; <sup>1</sup>H NMR: (400 MHz, CDCl<sub>3</sub>) 3.64 (t, *J* = 6.5 Hz, 2H, 1-H<sub>2</sub>), 3.52 (m, 1H, 12-H), 1.60-1.20 (m, 24H, 2-H<sub>2</sub>, 3-H<sub>2</sub>, 4-H<sub>2</sub>, 5-H<sub>2</sub>, 6-H<sub>2</sub>, 7-H<sub>2</sub>, 8-H<sub>2</sub>, 9-H<sub>2</sub>, 10-H<sub>2</sub>, 11-H<sub>2</sub>, 13-H<sub>2</sub> and two OHs), 0.94 (t, *J* = 7.6 Hz, 3H, 14-H<sub>3</sub>); <sup>13</sup>C NMR: (100 MHz, CDCl<sub>3</sub>) 73.3 (CH, C-12), 63.0 (CH<sub>2</sub>, C-1), 36.9 (CH<sub>2</sub>), 32.8 (CH<sub>2</sub>, C-2), 30.1 (CH<sub>2</sub>), 29.7 (CH<sub>2</sub>), 29.6 (CH<sub>2</sub>), 29.6 (CH<sub>2</sub>), 29.5 (CH<sub>2</sub>), 29.5 (CH<sub>2</sub>), 29.4 (CH<sub>2</sub>), 25.7 (CH<sub>2</sub>), 25.6 (CH<sub>2</sub>), 9.9 (CH<sub>3</sub>, C-14); MS: (CI, 200 eV) *m/z* 231 (M<sup>+</sup> + 1, 8.0), 213 (M<sup>+</sup> + 1 - H<sub>2</sub>O, 100); HRMS: (CI, 200 eV) calcd for C<sub>14</sub>H<sub>31</sub>O<sub>2</sub> 231.2324 found *m/z* 231.2325 (M<sup>+</sup> + 1). Anal. Calcd for C<sub>14</sub>H<sub>30</sub>O<sub>2</sub>: C, 72.99; H, 13.12. Found: C, 72.76; H, 13.03.

### 11-Bromo-1-trimethylsiloxyundecane

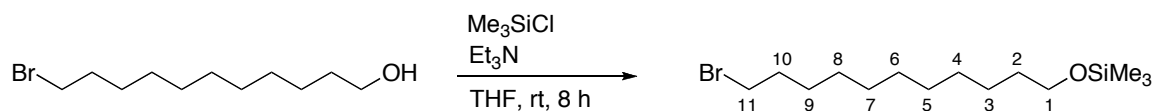

To a solution of 11-bromo-1-undecanol (80 mmol) in THF (100 mL) were added TMSCl (120 mmol) and Et<sub>3</sub>N (120 mmol). The reaction mixture was stirred for 8 h at rt. Evaporation of solvents and removal of the resultant salt by filtration to give a crude mixture. The resultant mixture was distilled to give the pure product as a colorless liquid (22.6 g, 88%). bp: 94 °C/ 0.05 mmHg; IR: (KBr) 2927, 1250, 1099 (Si-O) cm<sup>-1</sup>; <sup>1</sup>H NMR: (400 MHz, CDCl<sub>3</sub>) 3.57 (t, *J* = 6.8 Hz, 2H, 1-H<sub>2</sub>), 3.41 (t, *J* = 6.9 Hz, 2H, 11-H<sub>2</sub>), 1.85 (tt, *J* = 6.9, 6.9 Hz, 2H, 10-H<sub>2</sub>), 1.59-1.47 (m, 2H, 9-H<sub>2</sub>), 1.47-1.36 (m, 2H, 2-H<sub>2</sub>), 1.36-1.19 (m, 12H, 3-H<sub>2</sub>, 4-H<sub>2</sub>, 5-H<sub>2</sub>, 6-H<sub>2</sub>, 7-H<sub>2</sub> and 8-H<sub>2</sub>), 0.11 (s, 9H, SiMe<sub>3</sub>); <sup>13</sup>C NMR: (100 MHz, CDCl<sub>3</sub>) 62.7 (CH<sub>2</sub>, C-1), 34.1 (CH<sub>2</sub>, C-11), 32.8 (CH<sub>2</sub>, C-9 or C-10), 32.7 (CH<sub>2</sub>, C-10 or C-9), 29.6 (CH<sub>2</sub>), 29.5 (CH<sub>2</sub>), 29.4 (CH<sub>2</sub>), 29.4 (CH<sub>2</sub>), 28.7 (CH<sub>2</sub>), 28.2 (CH<sub>2</sub>), 25.8 (CH<sub>2</sub>), -0.5 (CH<sub>3</sub>, SiMe<sub>3</sub>); MS: (CI, 200 eV) *m/z* 325 (M<sup>+</sup> + 3, 100), 323 (M<sup>+</sup> + 1, 99.8); HRMS: (CI, 200 eV) calcd for C<sub>14</sub>H<sub>32</sub>BrOSi 325.1385 found *m/z* 325.1390 (M<sup>+</sup> + 3) and calcd for C<sub>14</sub>H<sub>32</sub>BrOSi 323.1406 found *m/z* 323.1387 (M<sup>+</sup> + 1). Anal. Calcd for C<sub>14</sub>H<sub>31</sub>BrOSi: C, 52.00; H, 9.66. Found: C, 52.08; H, 9.61.

### Tridecane-1,12-diol (1h)

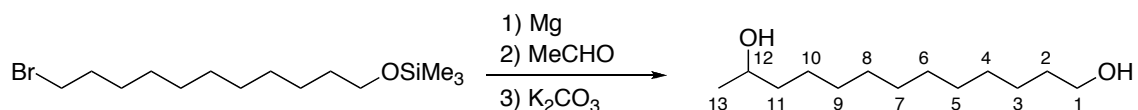

To a solution of Grignard reagent in THF (40 mL), which was synthesized from Mg (60 mmol) and 11-bromo-1-trimethylsilyloxyundecane (40 mmol) was added acetaldehyde (40 mmol) in THF (10 mL) dropwise at 0 °C. The reaction mixture was stirred for 1.5 h at rt. The mixture was cooled to 0 °C, then quenched by HCl (1N, 50 mL) and extracted with ether (100 x 3 mL). The collected organic layers were dried over MgSO<sub>4</sub>. The solvent was evaporated and added MeOH (120 mL). To a solution was added K<sub>2</sub>CO<sub>3</sub> in some portions at 0 °C. The reaction mixture was stirred for 4 h at rt. The mixture was cooled to 0 °C, then quenched by H<sub>2</sub>O (100 mL) and extracted with ether (70 x 3 mL). The collected organic layers were dried over MgSO<sub>4</sub>. The solvent was evaporated and purified by the residue was purified by recrystallization to give tridecane-1,12-diol as a white solid (28.7 mmol, 72 %). mp: 49-50 °C; IR: (KBr) 3309 (OH) cm<sup>-1</sup>; <sup>1</sup>H NMR: (400 MHz, CDCl<sub>3</sub>) 3.79 (m, 1H, 12-H), 3.64 (t, *J* = 6.5 Hz, 2H, 1-H<sub>2</sub>), 1.64-1.22 (m, 24H, 2-H<sub>2</sub>, 3-H<sub>2</sub>, 4-H<sub>2</sub>, 5-H<sub>2</sub>, 6-H<sub>2</sub>, 7-H<sub>2</sub>, 8-H<sub>2</sub>, 9-H<sub>2</sub>, 10-H<sub>2</sub>, 11-H<sub>2</sub>, and two OHs), 1.18 (d, *J* = 6.4 Hz, 3H, 13-H<sub>3</sub>); <sup>13</sup>C NMR: (100 MHz, CDCl<sub>3</sub>) 68.2 (CH, C-12), 63.1 (CH<sub>2</sub>, C-1), 39.3 (CH<sub>2</sub>), 32.8 (CH<sub>2</sub>), 29.6 (CH<sub>2</sub>), 29.6 (CH<sub>2</sub>), 29.5 (CH<sub>2</sub>), 29.4 (CH<sub>2</sub>), 25.8 (CH<sub>2</sub>), 25.7 (CH<sub>2</sub>), 23.5 (CH<sub>3</sub>, C-13), some signals are obscured by similar chemical shifts.; MS: (CI, 200 eV) *m/z* 217 (M<sup>+</sup> + 1, 14), 199 (M<sup>+</sup> + 1 - H<sub>2</sub>O, 100); HRMS: (CI, 200 eV) calcd for C<sub>13</sub>H<sub>29</sub>O<sub>2</sub> 217.2167 found *m/z* 217.2175 (M<sup>+</sup> + 1). Anal. Calcd for C<sub>13</sub>H<sub>28</sub>O<sub>2</sub>: C, 72.17; H, 13.04. Found: C, 71.95; H, 12.74.

### 2-(4-Hydroxypentyl)-isoindole-1,3-dione (1i)

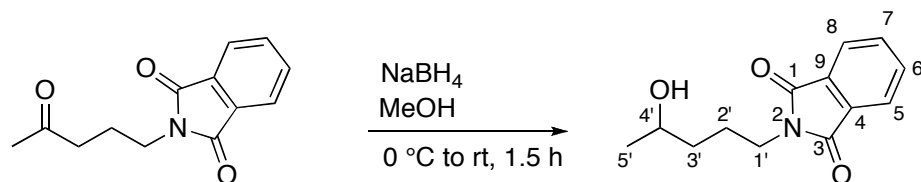

To a solution of crude 2-(4-oxo-pentyl)-isoindole-1,3-dione (ca.11 mmol) in MeOH (25 mL) was added NaBH<sub>4</sub> (5.5 mmol) in two portions at 0 °C. The reaction mixture was stirred for 1.5 h at rt. The mixture was cooled to 0 °C, then quenched by HCl aq (1M, 10 mL) and extracted with ether (20 x 3 mL). The collected organic layers were washed with NaHCO<sub>3</sub> aq (20 x 2 mL) and dried

over  $\text{MgSO}_4$ . The solvent was evaporated and the residue was purified by flash column chromatography (hexane/EtOAc, 50:50). Further purification was employed by distillation under reduced pressure to give the pure product as a pale yellow liquid (5.10 mmol, 58 %). bp: 185 °C / 0.4 mmHg; IR: (neat) 3444, 1774, 1709  $\text{cm}^{-1}$ ;  $^1\text{H}$  NMR: (400 MHz,  $\text{CDCl}_3$ ) 7.83 (dd,  $J = 5.4$ , 3.0 Hz, 2H, 5-H and 8-H), 7.72 (dd,  $J = 5.4$ , 3.0 Hz, 2H, 6-H and 7-H), 3.85 (tq,  $J = 6.7$ , 6.7 Hz, 2H, 4'-H), 3.71 (t, 2H, 1'-H<sub>2</sub>), 2.46 (s, 1H, OH), 1.85-1.70 (m, 2H, 3'-H<sub>2</sub>), 1.50 (m, 2H, 2'-H<sub>2</sub>), 1.19 (d,  $J = 6.7$ , 3H, 5'-H<sub>3</sub>);  $^{13}\text{C}$  NMR: (100 MHz,  $\text{CDCl}_3$ ) 168.4 (s, C-1 and C-3), 133.8 (d, C-6 and C-7), 131.9 (s, C-4 and C-9), 123.0 (d, C-5 and C-8), 67.2 (d, C-4'), 37.7 (d, C-1'), 35.9 (d, C-2'), 24.8 (t, C-3'), 23.3 (q, C-5'); MS: (EI, 70 eV)  $m/z$  233 ( $\text{M}^+$ , 2.8), 173 (32), 161 (39), 160 ( $\text{M}^+ - \text{CH}_2\text{CH}_2\text{CHOHCH}_3$ , 100), 149 (51), 85 (23); HRMS: (EI, 70 eV) calcd for  $\text{C}_{13}\text{H}_{15}\text{NO}_3$  233.1052 found  $m/z$  233.1048 ( $\text{M}^+$ ). Anal. Calcd for  $\text{C}_{13}\text{H}_{15}\text{NO}_3$ : C, 66.94; H, 6.48; N, 6.00. Found: C, 66.71; H, 6.35; N, 5.95.

### 1-Phenyl-3-(chlorodimethylsiloxy)butane (9)

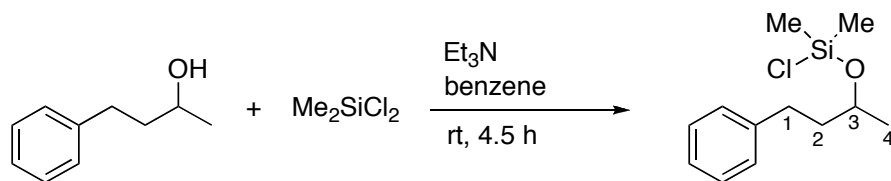

To a solution of 4-phenyl-2-butanol (9.0 g, 60 mmol) and triethylamine (10.6 g, 105 mmol) in benzene (30 mL) was slowly added a solution of  $\text{Me}_2\text{SiCl}_2$  (13.5 g, 105 mmol) in benzene (60 mL) at room temperature for 30 min. The mixture was stirred at rt for 4 h. Removal of the resultant salt by the centrifugal separation and evaporation of solvents gave a crude mixture. The resultant mixture was distilled to give the pure product as a colorless liquid (2.4 g, 16%). bp: 54 °C / 0.03 mmHg; IR: (neat) 1261  $\text{cm}^{-1}$ ;  $^1\text{H}$  NMR: (400 MHz,  $\text{CD}_2\text{Cl}_2$ ) 7.26-7.13 (m, 5 H, aroma), 4.07 (tq,  $J = 6.1$ , 6.1 Hz, 1H, 2-H), 2.71 (ddd,  $J = 13.9$ , 10.9, 5.8 Hz, 1H, 1-H<sub>A</sub>), 2.60 (ddd,  $J = 13.9$ , 10.3, 6.4 Hz, 1H, 1-H<sub>B</sub>), 1.78 (m, 2H, 2-H<sub>2</sub>), 1.23 (d,  $J = 6.1$  Hz, 3H, 4-H<sub>3</sub>), 0.45 (s, 3H, SiMe<sub>A</sub>), 0.44 (s, 3H, SiMe<sub>B</sub>);  $^{13}\text{C}$  NMR: (100 MHz,  $\text{CD}_2\text{Cl}_2$ ) 142.6 (s, *i*), 128.7 (d, *o* or *m*), 128.6 (d, *m* or *o*), 126.0 (d, *p*), 70.0 (d, C-3), 41.2 (t, C-2), 32.3 (t, C-1), 23.5 (q, C-4), 2.9 (q, SiMe<sub>A</sub>), 2.6 (q, SiMe<sub>B</sub>); MS: (CI, 200 eV)  $m/z$  245 ( $\text{M}^+ + 3$ , 1.39), 243 ( $\text{M}^+ + 1$ , 3.32), 133 ( $\text{M}^+ +$

1- HOSiMe<sub>2</sub>Cl, 100); HRMS: (CI, 200 eV) calcd for C<sub>12</sub>H<sub>20</sub>ClOSi 243.0972 found *m/z* 243.0964 (M<sup>+</sup> + 1).

**Procedure for optimization of chlorination of alcohols (Table 1).** According to the “General procedure for chlorination of alcohols catalyzed by GaCl<sub>3</sub>/tartrate system (Table 2)” as shown below, the reactions were employed under the conditions noted in text.

**General procedure for chlorination of alcohols catalyzed by GaCl<sub>3</sub>/tartrate system (Table 2).** To a solution of (+)-diethyl tartrate (0.1 mmol) in CH<sub>2</sub>Cl<sub>2</sub> (1 mL) were added GaCl<sub>3</sub> in pentane (0.5 M, 0.1 mL, 0.05 mmol), alcohol **1** (1.0 mmol), and HSiMe<sub>2</sub>Cl **2** (1.3 mmol) under nitrogen. The reaction mixture was stirred under the conditions noted in text. H<sub>2</sub> gas generated for the first ca. 15 minutes. The mixture was quenched by addition of water (10 mL) and extracted with diethyl ether (10 x 3 mL). The collected organic layer was dried over MgSO<sub>4</sub> and concentrated *in vacuo*. The procedures of further purification for new compounds are shown in the Product data section.

**General procedure for chlorination of alcohols catalyzed by GaCl<sub>3</sub> system (Table 3).** To a solution of GaCl<sub>3</sub> (in pentane 0.5 M, 0.1 mL, 0.05 mmol) in CH<sub>2</sub>Cl<sub>2</sub> (1 mL) were added alcohol **1** (1.0 mmol) and HSiMe<sub>2</sub>Cl **2** (1.3 mmol) under nitrogen. The reaction mixture was stirred under the conditions noted in text. The mixture was quenched by addition of water (10 mL) and extracted with diethyl ether (10 x 3 mL). The collected organic layer was dried over MgSO<sub>4</sub> and concentrated *in vacuo*. The procedures of further purification for new compounds are shown in the Product data section.

**Mechanistic investigation.** To a solution of (+)-diethyl tartrate (0.5 mmol) in CD<sub>2</sub>Cl<sub>2</sub> (1 mL) were added GaCl<sub>3</sub> in pentane (0.5 M, 0.1 mL, 0.05 mmol) and HSiMe<sub>2</sub>Cl **2** (1.0 mmol) under nitrogen. The reaction mixture was stirred at rt for 15 min. H<sub>2</sub> gas generated for the first ca. 2 minutes. The mixture was observed by NMR spectroscopy and the formation of **5** was confirmed (Chart A1-3: <sup>29</sup>Si NMR of HSiMe<sub>2</sub>Cl is also shown for comparison.). To the mixture including **5** was added 1-octanol (1.0 mmol) and the mixture was stirred at rt for 6 h. The mixture was

observed by NMR spectroscopy and the formation of chloro(octanoxy)silane **7** and diethyl tartrate **4a** was confirmed (Chart B1-3). The species **7** and **8** were assigned with the characteristic signals of the related compounds reported in the literature.<sup>4</sup> To a solution of GaCl<sub>3</sub> (in pentane 0.5 M, 0.1 mL, 0.05 mmol) in CH<sub>2</sub>Cl<sub>2</sub> (1 mL) was added chlorosilyl ether **9** (1.0 mmol) under nitrogen. The reaction mixture was stirred at rt for 5 h. The mixture was quenched by water (10 mL) and extracted with diethyl ether (10 x 3 mL). The collected organic layer was dried over MgSO<sub>4</sub> and concentrated *in vacuo*. The formation of **3a** was observed by NMR (62% yield).

Chart A1 ( $^1\text{H}$  NMR).

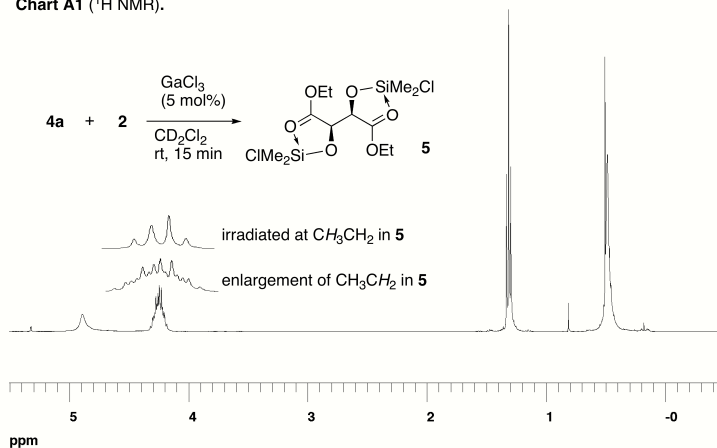

Chart A2 ( $^{13}\text{C}$  NMR).

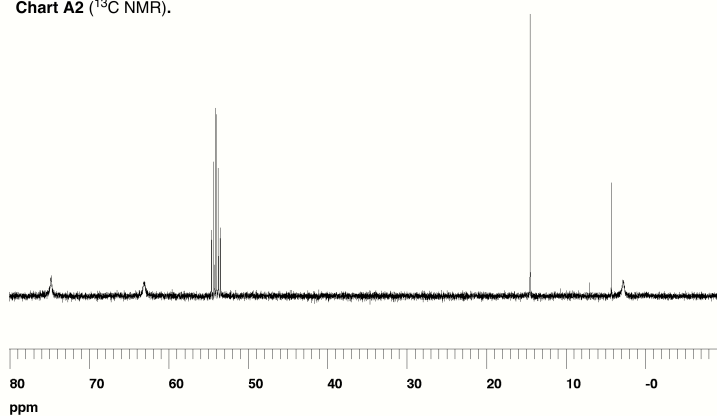

Chart A3 ( $^{29}\text{Si}$  NMR).

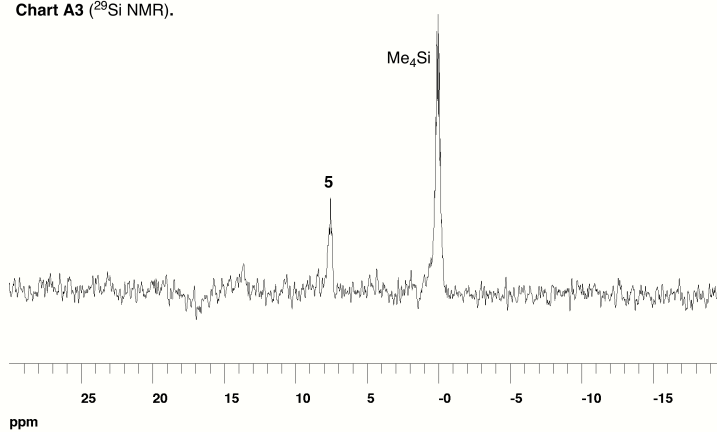

$\text{HSiMe}_2\text{Cl}$  ( $^{29}\text{Si}$  NMR).

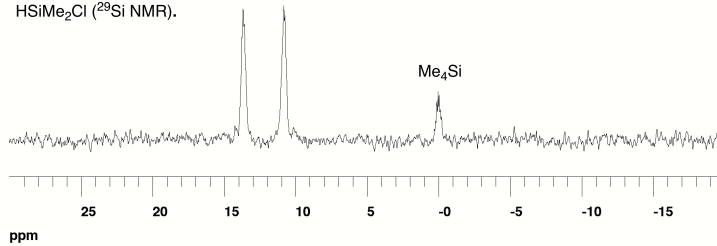



Chart B1 ( $^1\text{H}$  NMR).

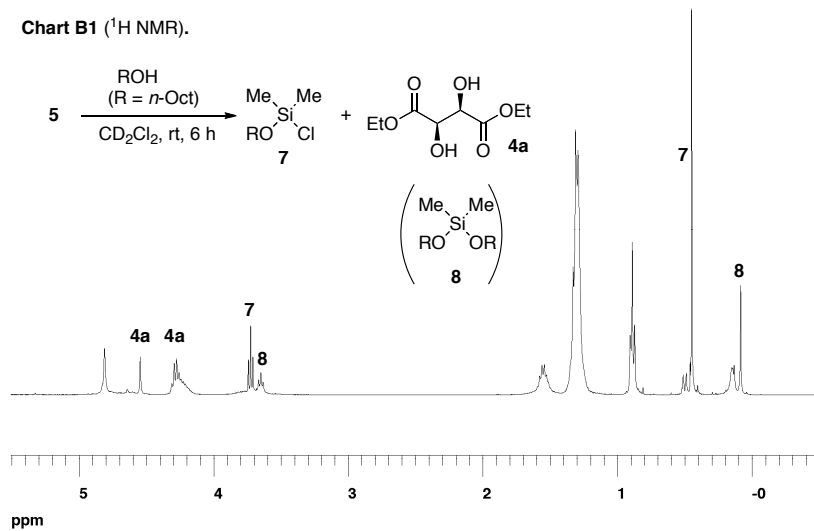

Chart B2 ( $^{13}\text{C}$  NMR).

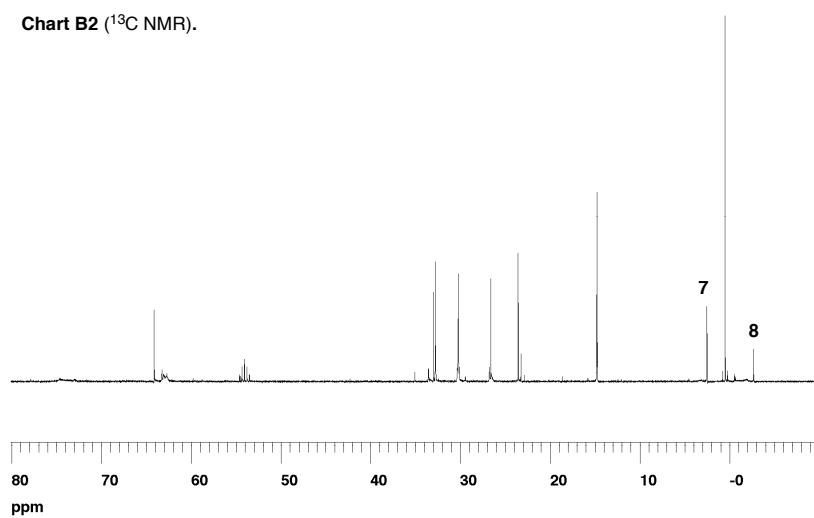

Chart B3 ( $^{29}\text{Si}$  NMR).

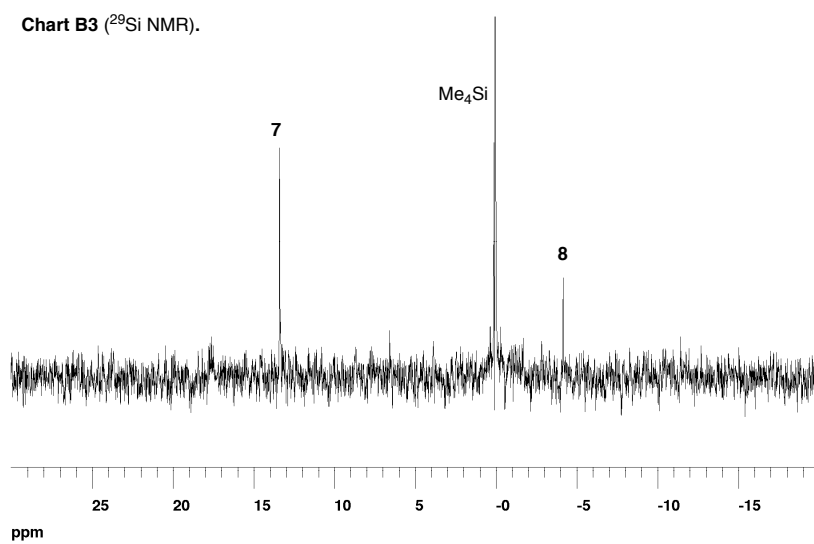

**Product data.** The spectral data of **3a**,<sup>5</sup> **3b**,<sup>6</sup> **3d**,<sup>7</sup> **3e**,<sup>7</sup> and **3k**<sup>1</sup> were in an excellent agreement with the reported data. The spectral data of **3c**, **3f**, **3m**, and **3n** were in an excellent agreement with those of commercially available products. Spectral data for the products, **3g-i**, **3j**, and **3l** are shown below.

### 12-Chlorotetradecyl acetate (**3g**)

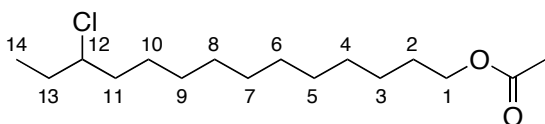

According to the general procedure, this compound was prepared from  $\text{HSiMe}_2\text{Cl}$ , **1g**,  $\text{GaCl}_3$ , and (+)-diethyl tartrate in dichloromethane to give the product as a colorless liquid after chromatography (hexane/EtOAc, 97:3). Further purification was performed by distillation under reduced pressure. Some rearrangement products were included: bp: 165 °C / 0.4 mmHg; IR: (neat) 2927 (C-H), 1743 (C=O), 1242  $\text{cm}^{-1}$ ;  $^1\text{H}$  NMR: (400 MHz,  $\text{CDCl}_3$ ) 4.05 (t,  $J = 6.8$  Hz, 2H, 1-H<sub>2</sub>), 3.85 (m, 1H, 12-H), 2.05 (s, 3H,  $\text{COCH}_3$ ), 1.03 (t,  $J = 7.4$  Hz, 3H, 14-H<sub>3</sub>) Other signals were not identified due to the overlap with those of rearrangement by-products;  $^{13}\text{C}$  NMR: (100 MHz,  $\text{CDCl}_3$ ) 171.3 (C, CO), 65.9 (CH, C-12), 64.5 ( $\text{CH}_2$ , C-1), 31.5 ( $\text{CH}_2$ , C-13), 10.9 ( $\text{CH}_3$ , C-14) Other signals were not identified due to the overlap with those of rearrangement by-products; MS: (CI, 200 eV)  $m/z$  293 ( $\text{M}^+ + 3$ , 31), 291 ( $\text{M}^+ + 1$ , 100), 255 ( $\text{M}^+ + 1 - \text{HCl}$ , 65), 195 ( $\text{M}^+ + 1 - \text{HCl} - \text{CH}_3\text{COOH}$ , 47); HRMS: (CI, 200 eV) calcd for  $\text{C}_{16}\text{H}_{32}\text{ClO}_2$  291.2091 found  $m/z$  291.2086 ( $\text{M}^+ + 1$ ). Anal. Calcd for  $\text{C}_{16}\text{H}_{31}\text{ClO}_2$ : C, 66.07; H, 10.74. Found: C, 66.36; H, 10.59.

### 12-Chloro-1-tridecanol (**3h**)

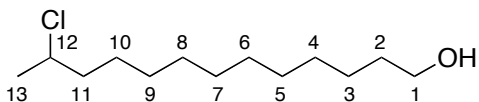

According to the general procedure, this compound was prepared from  $\text{HSiMe}_2\text{Cl}$ , **1h**,  $\text{GaCl}_3$ , and (+)-diethyl tartrate in dichloromethane to give the product as a colorless liquid after chromatography (hexane/EtOAc, 90:10). Further purification was performed by distillation under reduced pressure and GPC. Some rearrangement products were included: bp: 175 °C / 0.5 mmHg; IR: (neat) 3309 (OH)  $\text{cm}^{-1}$ ;  $^1\text{H}$  NMR: (400 MHz,  $\text{CDCl}_3$ ) 4.02 (tq,  $J = 6.6, 6.6$  Hz, 1H,

12-H), 1.50 (d,  $J = 6.6$  Hz, 3H, 13-H<sub>3</sub>) Other signals were not identified due to the overlap with those of rearrangement by-products; <sup>13</sup>C NMR: (100 MHz, CDCl<sub>3</sub>) 63.1 (CH<sub>2</sub>, C-1), 59.0 (CH, C-12), 40.4 (CH<sub>2</sub>, C-11), 25.7 (CH<sub>3</sub>, C-13) Other signals were not identified due to the overlap with those of rearrangement by-products; MS: (CI, 200 eV)  $m/z$  237 ( $M^+ + 3$ , 3.47), 235 ( $M^+ + 1$ , 12.3), 217 ( $M^+ + 1 - H_2O$ , 41.0), 199 ( $M^+ + 1 - HCl$ , 100), 181 ( $M^+ + 1 - HCl - H_2O$ , 22.1), 125 (24.0), 111 (26.6), 97 (21.1); HRMS: (CI, 200 eV) calcd for C<sub>13</sub>H<sub>28</sub>ClO 235.1829 found  $m/z$  235.1822 ( $M^+ + 1$ ). Anal. Calcd for C<sub>13</sub>H<sub>27</sub>ClO: C, 66.50; H, 11.59. Found: C, 66.42; H, 11.44.

### 2-(4-Chloropentyl)isoindole-1,3-dione (3i)

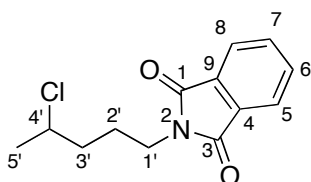

According to the general procedure, this compound was prepared from HSiMe<sub>2</sub>Cl, **1i**, GaCl<sub>3</sub>, and (+)-diethyl tartrate in dichloromethane to give the product as a colorless liquid after chromatography (hexane/EtOAc, 80:20). Further purification was performed by distillation under reduced pressure: bp: 175 °C / 1.0 mmHg; IR: (neat) 1774, 1712 cm<sup>-1</sup>; <sup>1</sup>H NMR: (400 MHz, CDCl<sub>3</sub>) 7.85 (dd,  $J = 5.4, 3.2$  Hz, 2H, 5-H and 8-H), 7.73 (dd,  $J = 5.4, 3.2$  Hz, 2H, 6-H and 7-H), 4.08 (tq,  $J = 6.8, 6.8$  Hz, 1H, 4'-H), 3.72 (t,  $J = 6.8$  Hz, 2H, 1'-H<sub>2</sub>), 1.92 (m, 1H, 3'-H<sup>A</sup>), 1.87-1.72 (m, 3H, 3'-H<sup>B</sup> and 2'-H<sub>2</sub>), 1.50 (d,  $J = 6.8$  Hz, 3H, 5'-H<sub>3</sub>); <sup>13</sup>C NMR: (100 MHz, CDCl<sub>3</sub>) 168.4 (s, C-1 and C-3), 134.0 (d, C-6 and C-7), 132.0 (s, C-4 and C-9), 123.2 (d, C-5 and C-8), 57.9 (d, C-7'), 37.3 (d, C-1'), 37.3 (d, C-3'), 25.9 (t, C-2'), 25.4 (q, C-5'); MS: (EI, 70 eV)  $m/z$  253 ( $M^+ + 2$ , 0.82), 251 ( $M^+$ , 2.5), 160 ( $M^+ - CH_2CH_2CHClCH_3$ , 100); HRMS: (EI, 70 eV) calcd for C<sub>13</sub>H<sub>14</sub>ClNO<sub>2</sub> 251.0709 found  $m/z$  251.0713 ( $M^+$ ). Anal. Calcd for C<sub>13</sub>H<sub>14</sub>ClNO<sub>2</sub>: C, 62.03; H, 5.61; N, 5.56. Found: C, 61.74; H, 5.49; N, 5.60.

### 2-Chloro-2-methylhexane (3j)

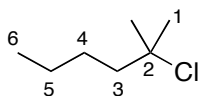

According to the general procedure, this compound was prepared from HSiMe<sub>2</sub>Cl, **1j**, and GaCl<sub>3</sub>, in dichloromethane to give the product as a colorless liquid after chromatography (hexane/EtOAc, 90:10). Further purification was performed by distillation under reduced pressure: bp: 58 °C / 50 mmHg; IR: (neat) 2962, 1466 cm<sup>-1</sup>; <sup>1</sup>H NMR: (400 MHz, CDCl<sub>3</sub>) 1.74 (m, 2H, 3-H<sub>2</sub>), 1.57 (s, 3H, 1-H<sub>3</sub> or 2-Me), 1.57 (s, 3H, 2-Me or 1-H<sub>3</sub>), 1.46 (m, 2H, 4-H<sub>2</sub>), 1.33 (tq, *J* = 7.4, 7.4 Hz, 2H, 5-H<sub>2</sub>), 0.93 (t, *J* = 7.4 Hz, 3H, 6-H<sub>3</sub>); <sup>13</sup>C NMR: (100 MHz, CDCl<sub>3</sub>) 71.3 (s, C-2), 45.8 (t, C-3), 32.4 (q, C-1 and 2-Me), 27.3 (t, C-4), 22.8 (t, C-5), 14.0 (q, C-6); MS: (EI, 70 eV) *m/z* 121 (M<sup>+</sup> + 2 - CH<sub>3</sub>, 0.75), 119 (M<sup>+</sup> - CH<sub>3</sub>, 2.2), 99 (M<sup>+</sup> - Cl, 17), 77 (C(CH<sub>3</sub>)<sub>2</sub>Cl, 65), 56 (100), 41 (55); HRMS: (EI, 70 eV) calcd for C<sub>6</sub>H<sub>12</sub>Cl 119.0628 found *m/z* 119.0630 (M<sup>+</sup> - CH<sub>3</sub>). Anal. Calcd for C<sub>7</sub>H<sub>15</sub>Cl: C, 62.44; H, 11.23. Found: C, 62.59; H, 11.05.

### 2-(7-Chloro-3,7-dimethyloctyl)isoindole-1,3-dione (**3l**)

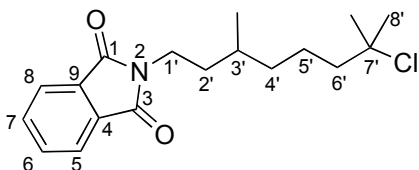

According to the general procedure, this compound was prepared from HSiMe<sub>2</sub>Cl, **1h**, and GaCl<sub>3</sub> in dichloromethane to give the product as a solid after recrystallization (hexane/ether): mp: 88-90 °C; IR: (KBr) 1770, 1712 cm<sup>-1</sup>; <sup>1</sup>H NMR: (400 MHz, CDCl<sub>3</sub>) 7.84 (dd, *J* = 5.6, 3.2 Hz, 2H, 5-H and 8-H), 7.71 (dd, *J* = 5.6, 3.2 Hz, 2H, 6-H and 7-H), 3.71 (m, 2H, 1'-H<sub>2</sub>), 1.70 (m, 3H), 1.56 (s, 6H, 8'-H<sub>3</sub> and 7'-Me), 1.59-1.21 (m, 5H), 1.21 (m, 1H), 0.99 (d, *J* = 6.3 Hz, 3H, 3'-Me); <sup>13</sup>C NMR: (100 MHz, CDCl<sub>3</sub>) 168.4 (C, C-1 and C-3), 133.8 (CH, C-6 and C-7), 132.2 (C, C-4 and C-9), 123.1 (CH, C-5 and C-8), 71.2 (C, C-7'), 46.2 (CH<sub>2</sub>), 36.7 (CH<sub>2</sub>), 36.2 (CH<sub>2</sub>), 35.5 (CH<sub>2</sub>), 32.4 (CH<sub>3</sub>, 7'-Me), 32.4 (CH<sub>3</sub>, C-8'), 30.6 (CH, C-3'), 22.3 (CH<sub>2</sub>), 19.3 (CH<sub>3</sub>, 3'-Me); MS: (EI, 70 eV) *m/z* 323 (M<sup>+</sup> + 2, 2.41), 321 (M<sup>+</sup>, 6.94), 200 (23.0), 161 (47.2), 160 (PhthNCH<sub>2</sub>, 100), 148 (28.2); HRMS: (EI, 70 eV) calcd for C<sub>18</sub>H<sub>24</sub>ClNO<sub>2</sub> 321.1496 found *m/z* 321.1502 (M<sup>+</sup>). Anal. Calcd for C<sub>18</sub>H<sub>24</sub>ClNO<sub>2</sub>: C, 67.17; H, 7.52; N, 4.35. Found: C, 67.15; H, 7.38; N, 4.47.

### References

1) Nishimoto, Y.; Yasuda, M.; Baba, A. *Org. Lett.* **2007**, 9, 4931-4934.

- 2) Saito, T.; Nishimoto, Y.; Yasuda, M.; Baba, A. *J. Org. Chem.* **2007**, *72*, 8588-8590.
- 3) Ishihara, K.; Kurihara, H.; Yamamoto, H. *J. Org. Chem.* **1993**, *58*, 3791-3792.
- 4) E. Liepins, I. Zicmane, E. Lukevics, *J. Organometal. Chem.* **1986**, *306*, 167-182.
- 5) Barrett, A. G. M.; Braddock, D. C.; James, R. A.; Koike, N.; Procopiou, P. A. *J. Org. Chem.* **1998**, *63*, 6273-6280.
- 6) Yus, M.; Herrera, R. P.; Guijarro, A. *Chem. Eur. J.* **2002**, *8*, 2574-2584.
- 7) Yasuda, M.; Yamasaki, S.; Onishi, Y.; Baba, A. *J. Am. Chem. Soc.* **2004**, *126*, 7186-7187.
